# Supplementary material
Source: MDPI journal article supplement (https://www.mdpi.com/2071-1050/4/9/2317)
Supplement: s1 [file s1]

Name

Institution and Position (if applicable)

Brief description of the activities of your institution in OMYK

Brief description of your activities in OMYK

Time working in OMYK

## I. GOAL RANKING

Please rank the following issues from the most to the least important. Use number 1 to indicate the goal you consider as the most important. Two or more options might be ranked as equally important.

Which should be the main objectives of the area?

- To conserve biodiversity \_\_\_\_\_
- To preserve traditional activities of resources use and extraction \_\_\_\_\_
- To contribute to regional development \_\_\_\_\_
- To improve local people's life quality \_\_\_\_\_
- To preserve cultural traditions \_\_\_\_\_
- To promote scientific research \_\_\_\_\_
- Other \_\_\_\_\_

## II. OPEN ENDED QUESTIONS

Please provide your opinion regarding the following issues. Expend as much as you need

1. In terms of forest conservation, are you aware of any relevant action taking place in the Protected Area? If yes,  
What action?  
Who is carrying it out?  
Why do you consider it relevant?
2. In terms of social development, are you aware of any relevant action taking place in the Protected Area? If yes,  
What action?  
Who is carrying it out?  
Why do you consider it relevant?
3. From your knowledge, which actor(s) or institutions are present in the reserve?  
From the actors you mentioned, with whom do you have regular contact?  
What does it mainly consist this contact?
4. In your opinion, what is the main problematic (if any) in terms of cultural issues in the Protected Area?
5. In your opinion, what is the main problematic (if any) in terms of socioeconomic issues in the Protected Area?
6. In your opinion, what is the main problematic (if any) in terms of use and extraction of natural resources in the Protected Area?
7. What relevant action(s) would you recommend to implement in order to make forest conservation efforts effective in the area?
8. Who else should I talk about these issues?

Please provide any opinion, suggestion or comment that was not cover in this questionnaire.
